# Supplementary material for: Heterotrophic and Photoautotrophic Media Optimization Using Response Surface Methodology for the Novel Microalga Chlorococcum amblystomatis
Source: MDPI journal article supplement (doi:10.3390/app13042089), 2023-02-06
Supplement: s1 [file s1]

# Supplementary Materials

**Table S1.** Calibration curves of pigments standards.

| Pigment           | Calibration Curve  | R <sup>2</sup> |
|-------------------|--------------------|----------------|
| Neoxanthin        | $Y = 211396.552X$  | 0.984          |
| Violaxanthin      | $Y = 683267X$      | 0.991          |
| Lutein            | $Y = 1040947.234X$ | 0.989          |
| $\beta$ -carotene | $Y = 61499.087X$   | 0.987          |

**Table S2.** Experimental layout of the Plackett-Burman design and results of heterotrophic *Chlorococcum amblystomatis* specific growth rates ( $\mu$ ).

| Run Order | Nitrogen Source                                 | N mM | P mM | Ca mM | Mg mM | Fe mM | Zn mM | Co mM | Mo mM | Mn mM | Ni mM | Cu mM | B mM | Vitamins Doses | T °C | $\mu$ h <sup>-1</sup> |
|-----------|-------------------------------------------------|------|------|-------|-------|-------|-------|-------|-------|-------|-------|-------|------|----------------|------|-----------------------|
| 1         | (NH <sub>4</sub> ) <sub>2</sub> SO <sub>4</sub> | 20   | 100  | 5     | 10    | 0.5   | 0.5   | 0     | 0.1   | 1.5   | 0     | 0.02  | 0.5  | 3              | 26   | 0.04                  |
| 2         | (NH <sub>2</sub> ) <sub>2</sub> CO              | 60   | 100  | 1     | 1     | 0.05  | 0.5   | 0.04  | 0     | 1.5   | 0     | 0.02  | 1.5  | 3              | 30   | 0.05                  |
| 3         | (NH <sub>2</sub> ) <sub>2</sub> CO              | 60   | 10   | 5     | 1     | 0.5   | 2.5   | 0.04  | 0.1   | 0.2   | 0     | 0.02  | 0.5  | 3              | 30   | 0.06                  |
| 4         | (NH <sub>2</sub> ) <sub>2</sub> CO              | 20   | 10   | 1     | 1     | 0.05  | 0.5   | 0     | 0     | 0.2   | 0     | 0     | 0.5  | 0.5            | 26   | 0.07                  |
| 5         | (NH <sub>4</sub> ) <sub>2</sub> SO <sub>4</sub> | 60   | 100  | 1     | 1     | 0.5   | 2.5   | 0     | 0.1   | 1.5   | 0     | 0     | 0.5  | 0.5            | 30   | 0.04                  |
| 6         | (NH <sub>2</sub> ) <sub>2</sub> CO              | 20   | 10   | 1     | 10    | 0.05  | 2.5   | 0     | 0.1   | 1.5   | 0.02  | 0     | 0.5  | 3              | 30   | 0.07                  |
| 7         | (NH <sub>2</sub> ) <sub>2</sub> CO              | 20   | 100  | 5     | 1     | 0.5   | 2.5   | 0     | 0     | 0.2   | 0     | 0     | 1.5  | 3              | 26   | 0.06                  |
| 8         | (NH <sub>4</sub> ) <sub>2</sub> SO <sub>4</sub> | 60   | 100  | 5     | 1     | 0.05  | 2.5   | 0.04  | 0     | 1.5   | 0.02  | 0     | 0.5  | 0.5            | 26   | 0.04                  |
| 9         | (NH <sub>4</sub> ) <sub>2</sub> SO <sub>4</sub> | 20   | 10   | 5     | 10    | 0.05  | 2.5   | 0.04  | 0     | 0.2   | 0     | 0.02  | 0.5  | 0.5            | 30   | 0.05                  |
| 10        | (NH <sub>2</sub> ) <sub>2</sub> CO              | 60   | 100  | 5     | 10    | 0.05  | 0.5   | 0.04  | 0.1   | 0.2   | 0.02  | 0     | 0.5  | 3              | 26   | 0.05                  |
| 11        | (NH <sub>2</sub> ) <sub>2</sub> CO              | 60   | 10   | 5     | 10    | 0.5   | 2.5   | 0     | 0     | 1.5   | 0.02  | 0.02  | 1.5  | 0.5            | 26   | 0.06                  |
| 12        | (NH <sub>4</sub> ) <sub>2</sub> SO <sub>4</sub> | 40   | 55   | 3     | 5.5   | 0.275 | 1.5   | 0.02  | 0.05  | 0.85  | 0.01  | 0.01  | 1    | 1.75           | 28   | 0.05                  |
| 13        | (NH <sub>2</sub> ) <sub>2</sub> CO              | 20   | 100  | 1     | 10    | 0.05  | 2.5   | 0.04  | 0.1   | 1.5   | 0     | 0.02  | 1.5  | 0.5            | 26   | 0.04                  |
| 14        | (NH <sub>4</sub> ) <sub>2</sub> SO <sub>4</sub> | 60   | 10   | 1     | 1     | 0.05  | 2.5   | 0     | 0.1   | 0.2   | 0.02  | 0.02  | 1.5  | 3              | 26   | 0.05                  |
| 15        | (NH <sub>4</sub> ) <sub>2</sub> SO <sub>4</sub> | 20   | 100  | 5     | 1     | 0.05  | 0.5   | 0     | 0.1   | 0.2   | 0.02  | 0.02  | 1.5  | 0.5            | 30   | 0.04                  |
| 16        | (NH <sub>4</sub> ) <sub>2</sub> SO <sub>4</sub> | 60   | 10   | 5     | 10    | 0.05  | 0.5   | 0     | 0     | 1.5   | 0     | 0     | 1.5  | 3              | 30   | 0.05                  |
| 17        | (NH <sub>4</sub> ) <sub>2</sub> SO <sub>4</sub> | 60   | 10   | 1     | 10    | 0.5   | 0.5   | 0.04  | 0.1   | 0.2   | 0     | 0     | 1.5  | 0.5            | 26   | 0.05                  |
| 18        | (NH <sub>2</sub> ) <sub>2</sub> CO              | 60   | 100  | 1     | 10    | 0.5   | 0.5   | 0     | 0     | 0.2   | 0.02  | 0.02  | 0.5  | 0.5            | 30   | 0.05                  |
| 19        | (NH <sub>2</sub> ) <sub>2</sub> CO              | 20   | 10   | 5     | 1     | 0.5   | 0.5   | 0.04  | 0.1   | 1.5   | 0.02  | 0     | 1.5  | 0.5            | 30   | 0.07                  |
| 20        | (NH <sub>4</sub> ) <sub>2</sub> SO <sub>4</sub> | 20   | 100  | 1     | 10    | 0.5   | 2.5   | 0.04  | 0     | 0.2   | 0.02  | 0     | 1.5  | 3              | 30   | 0.04                  |
| 21        | (NH <sub>2</sub> ) <sub>2</sub> CO              | 40   | 55   | 3     | 5.5   | 0.275 | 1.5   | 0.02  | 0.05  | 0.85  | 0.01  | 0.01  | 1    | 1.75           | 28   | 0.06                  |
| 22        | (NH <sub>4</sub> ) <sub>2</sub> SO <sub>4</sub> | 20   | 10   | 1     | 1     | 0.5   | 0.5   | 0.04  | 0     | 1.5   | 0.02  | 0.02  | 0.5  | 3              | 26   | 0.05                  |
